# Supplementary material
Source: publisher figshare collection journal article supplement (https://acs.figshare.com/ndownloader/files/4572739)
Supplement: Supplementary file 1 [file 4572739]

 
data_PCN_17_Dy 
 
_audit_creation_method            SHELXL-97 
_chemical_name_systematic 
; 
 ? 
; 
_chemical_name_common             'PCN-17 (Dy)' 
_chemical_melting_point           'NOT MEASURED' 
_chemical_formula_moiety          
'Dy4 (H2O) (SO4)2 (C24H12N3O6)8/3 4(C2H6SO) 2(H2O)'  
_chemical_formula_sum 
 'C72 H62 Dy4 N8 O31 S6' 
_chemical_formula_weight          2377.66 
 
loop_ 
 _atom_type_symbol 
 _atom_type_description 
 _atom_type_scat_dispersion_real 
 _atom_type_scat_dispersion_imag 
 _atom_type_scat_source 
 'C'  'C'   0.0033   0.0016 
 'International Tables Vol C Tables 4.2.6.8 and 6.1.1.4' 
 'H'  'H'   0.0000   0.0000 
 'International Tables Vol C Tables 4.2.6.8 and 6.1.1.4' 
 'N'  'N'   0.0061   0.0033 
 'International Tables Vol C Tables 4.2.6.8 and 6.1.1.4' 
 'O'  'O'   0.0106   0.0060 
 'International Tables Vol C Tables 4.2.6.8 and 6.1.1.4' 
 'S'  'S'   0.1246   0.1234 
 'International Tables Vol C Tables 4.2.6.8 and 6.1.1.4' 
 'Dy'  'Dy'  -0.1892   4.4098 
 'International Tables Vol C Tables 4.2.6.8 and 6.1.1.4' 
 
_symmetry_cell_setting            Cubic  
_symmetry_space_group_name_H-M    Im-3m
 
loop_ 
 _symmetry_equiv_pos_as_xyz 
 'x, y, z' 
 '-y, x, z' 
 '-x, -y, z' 
 'y, -x, z' 
 'x, -z, y' 
 'x, -y, -z' 
 'x, z, -y' 
 'z, y, -x' 
 '-x, y, -z' 
 '-z, y, x' 
 'z, x, y' 
 'y, z, x' 
 '-y, -z, x' 
 'z, -x, -y' 
 '-y, z, -x' 
 '-z, -x, y' 
 '-z, x, -y' 
 'y, -z, -x' 
 'y, x, -z' 
 '-y, -x, -z' 
 '-x, z, y' 
 '-x, -z, -y' 
 'z, -y, x' 
 '-z, -y, -x' 
 'x+1/2, y+1/2, z+1/2' 
 '-y+1/2, x+1/2, z+1/2' 
 '-x+1/2, -y+1/2, z+1/2' 
 'y+1/2, -x+1/2, z+1/2' 
 'x+1/2, -z+1/2, y+1/2' 
 'x+1/2, -y+1/2, -z+1/2' 
 'x+1/2, z+1/2, -y+1/2' 
 'z+1/2, y+1/2, -x+1/2' 
 '-x+1/2, y+1/2, -z+1/2' 
 '-z+1/2, y+1/2, x+1/2' 
 'z+1/2, x+1/2, y+1/2' 
 'y+1/2, z+1/2, x+1/2' 
 '-y+1/2, -z+1/2, x+1/2' 
 'z+1/2, -x+1/2, -y+1/2' 
 '-y+1/2, z+1/2, -x+1/2' 
 '-z+1/2, -x+1/2, y+1/2' 
 '-z+1/2, x+1/2, -y+1/2' 
 'y+1/2, -z+1/2, -x+1/2' 
 'y+1/2, x+1/2, -z+1/2' 
 '-y+1/2, -x+1/2, -z+1/2' 
 '-x+1/2, z+1/2, y+1/2' 
 '-x+1/2, -z+1/2, -y+1/2' 
 'z+1/2, -y+1/2, x+1/2' 
 '-z+1/2, -y+1/2, -x+1/2' 
 '-x, -y, -z' 
 'y, -x, -z' 
 'x, y, -z' 
 '-y, x, -z' 
 '-x, z, -y' 
 '-x, y, z' 
 '-x, -z, y' 
 '-z, -y, x' 
 'x, -y, z' 
 'z, -y, -x' 
 '-z, -x, -y' 
 '-y, -z, -x' 
 'y, z, -x' 
 '-z, x, y' 
 'y, -z, x' 
 'z, x, -y' 
 'z, -x, y' 
 '-y, z, x' 
 '-y, -x, z' 
 'y, x, z' 
 'x, -z, -y' 
 'x, z, y' 
 '-z, y, -x' 
 'z, y, x' 
 '-x+1/2, -y+1/2, -z+1/2' 
 'y+1/2, -x+1/2, -z+1/2' 
 'x+1/2, y+1/2, -z+1/2' 
 '-y+1/2, x+1/2, -z+1/2' 
 '-x+1/2, z+1/2, -y+1/2' 
 '-x+1/2, y+1/2, z+1/2' 
 '-x+1/2, -z+1/2, y+1/2' 
 '-z+1/2, -y+1/2, x+1/2' 
 'x+1/2, -y+1/2, z+1/2' 
 'z+1/2, -y+1/2, -x+1/2' 
 '-z+1/2, -x+1/2, -y+1/2' 
 '-y+1/2, -z+1/2, -x+1/2' 
 'y+1/2, z+1/2, -x+1/2' 
 '-z+1/2, x+1/2, y+1/2' 
 'y+1/2, -z+1/2, x+1/2' 
 'z+1/2, x+1/2, -y+1/2' 
 'z+1/2, -x+1/2, y+1/2' 
 '-y+1/2, z+1/2, x+1/2' 
 '-y+1/2, -x+1/2, z+1/2' 
 'y+1/2, x+1/2, z+1/2' 
 'x+1/2, -z+1/2, -y+1/2' 
 'x+1/2, z+1/2, y+1/2' 
 '-z+1/2, y+1/2, -x+1/2' 
 'z+1/2, y+1/2, x+1/2' 
 
_cell_length_a                    26.348(3) 
_cell_length_b                    26.348(3) 
_cell_length_c                    26.348(3) 
_cell_angle_alpha                 90.00 
_cell_angle_beta                  90.00 
_cell_angle_gamma                 90.00 
_cell_volume                      18292(4) 
_cell_formula_units_Z             6 
_cell_measurement_temperature     213(2) 
_cell_measurement_reflns_used     4938 
_cell_measurement_theta_min       2.445 
_cell_measurement_theta_max       18.889 
 
_exptl_crystal_description        block 
_exptl_crystal_colour             brown 
_exptl_crystal_size_max           0.13 
_exptl_crystal_size_mid           0.12 
_exptl_crystal_size_min           0.09
_exptl_crystal_density_meas       none 
_exptl_crystal_density_diffrn     1.295 
_exptl_crystal_density_method     'not measured' 
_exptl_crystal_F_000              6948 
_exptl_absorpt_coefficient_mu     2.585 
_exptl_absorpt_correction_type    empirical
_exptl_absorpt_correction_T_min   0.722 
_exptl_absorpt_correction_T_max   0.792 
_exptl_absorpt_process_details    SADABS 
 
_exptl_special_details 
; 
 ? 
; 
 
_diffrn_ambient_temperature       213(2) 
_diffrn_radiation_wavelength      0.71073 
_diffrn_radiation_type            MoK\a 
_diffrn_radiation_source          'fine-focus sealed tube' 
_diffrn_radiation_monochromator   graphite 
_diffrn_measurement_device_type   'CCD area detector' 
_diffrn_measurement_method        'phi and omega scans' 
_diffrn_detector_area_resol_mean  ? 
_diffrn_standards_number          ? 
_diffrn_standards_interval_count  ? 
_diffrn_standards_interval_time   ? 
_diffrn_standards_decay_%         ? 
_diffrn_reflns_number             35535 
_diffrn_reflns_av_R_equivalents   0.0697 
_diffrn_reflns_av_sigmaI/netI     0.0287 
_diffrn_reflns_limit_h_min        -26 
_diffrn_reflns_limit_h_max        25 
_diffrn_reflns_limit_k_min        -26 
_diffrn_reflns_limit_k_max        26 
_diffrn_reflns_limit_l_min        -24 
_diffrn_reflns_limit_l_max        26 
_diffrn_reflns_theta_min          1.55 
_diffrn_reflns_theta_max          20.81 
_reflns_number_total              972 
_reflns_number_gt                 890 
_reflns_threshold_expression      >2sigma(I) 
 
_computing_data_collection        'Bruker SMART' 
_computing_cell_refinement        'Bruker SMART' 
_computing_data_reduction         'Bruker SMART' 
_computing_structure_solution     'SHELXS-97 (Sheldrick, 1990)' 
_computing_structure_refinement   'SHELXL-97 (Sheldrick, 1997)' 
_computing_molecular_graphics     'Bruker SHELXTL' 
_computing_publication_material   'Bruker SHELXTL' 
 
_refine_special_details 
; 
 Refinement of F^2^ against ALL reflections.  The weighted R-factor wR and 
 goodness of fit S are based on F^2^, conventional R-factors R are based 
 on F, with F set to zero for negative F^2^. The threshold expression of 
 F^2^ > 2sigma(F^2^) is used only for calculating R-factors(gt) etc. and is 
 not relevant to the choice of reflections for refinement.  R-factors based 
 on F^2^ are statistically about twice as large as those based on F, and R- 
 factors based on ALL data will be even larger. 
; 
 
_refine_ls_structure_factor_coef  Fsqd  
_refine_ls_matrix_type            full 
_refine_ls_weighting_scheme       calc  
_refine_ls_weighting_details 
 'calc w=1/[\s^2^(Fo^2^)+(0.1000P)^2^+125.1325P] where P=(Fo^2^+2Fc^2^)/3' 
_atom_sites_solution_primary      direct 
_atom_sites_solution_secondary    difmap 
_atom_sites_solution_hydrogens    geom 
_refine_ls_hydrogen_treatment     constr 
_refine_ls_extinction_method      none 
_refine_ls_extinction_coef        ? 
_refine_ls_number_reflns          972 
_refine_ls_number_parameters      93 
_refine_ls_number_restraints      0 
_refine_ls_R_factor_all           0.0650 
_refine_ls_R_factor_gt            0.0601 
_refine_ls_wR_factor_ref          0.1723 
_refine_ls_wR_factor_gt           0.1668 
_refine_ls_goodness_of_fit_ref    1.086 
_refine_ls_restrained_S_all       1.086 
_refine_ls_shift/su_max           0.000 
_refine_ls_shift/su_mean          0.000 
 
loop_ 
 _atom_site_label 
 _atom_site_type_symbol 
 _atom_site_fract_x 
 _atom_site_fract_y 
 _atom_site_fract_z 
 _atom_site_U_iso_or_equiv 
 _atom_site_adp_type 
 _atom_site_occupancy 
 _atom_site_symmetry_multiplicity 
 _atom_site_calc_flag 
 _atom_site_refinement_flags 
 _atom_site_disorder_assembly 
 _atom_site_disorder_group 
Dy1 Dy -0.5000 0.13592(7) 0.0000 0.0534(6) Uani 0.50 4 d SP . . 
Dy1' Dy -0.5000 0.1099(3) 0.0000 0.227(4) Uani 0.50 4 d SP . . 
S1 S -0.5000 0.2500 0.0000 0.121(3) Uani 1 8 d S . . 
O1 O -0.5000 0.2841(6) 0.0374(6) 0.366(19) Uani 1 2 d S . . 
O2 O -0.4436(3) 0.1208(3) 0.0613(4) 0.153(4) Uani 1 1 d . . . 
O3 O -0.5000 0.0000 0.0000 0.22(3) Uani 1 16 d S . . 
N1 N -0.2343(4) 0.2343(4) 0.1699(5) 0.127(6) Uani 1 2 d S . . 
C1 C -0.3617(5) 0.1669(5) 0.1050(5) 0.150(6) Uani 1 1 d . . . 
H1A H -0.3767 0.1823 0.0765 0.180 Uiso 1 1 calc R . . 
C2 C -0.2982(6) 0.1687(5) 0.1687(5) 0.115(6) Uani 1 2 d S . . 
C3 C -0.2528(6) 0.1924(5) 0.1924(5) 0.120(6) Uani 1 2 d S . . 
C4 C -0.3192(5) 0.1891(5) 0.1268(5) 0.149(6) Uani 1 1 d . . . 
H4A H -0.3050 0.2184 0.1123 0.178 Uiso 1 1 calc R . . 
C6 C -0.4256(6) 0.1005(5) 0.1005(5) 0.112(5) Uani 1 2 d S . . 
C7 C -0.3819(6) 0.1239(5) 0.1239(5) 0.124(7) Uani 1 2 d S . . 
O6 O -0.2541(7) 0.0000 0.2541(7) 0.36(3) Uani 1 4 d S . . 
S2 S -0.2885(3) 0.0000 0.2885(3) 0.277(9) Uani 1 4 d S . . 
O4 O -0.1620(4) 0.0000 0.0000 0.060(4) Uani 1 8 d S . . 
C8 C -0.2786(8) 0.0000 0.3482(8) 0.168(8) Uani 1 2 d S . . 
H8A H -0.3108 0.0000 0.3660 0.251 Uiso 1 2 calc SR . . 
H8B H -0.2594 0.0301 0.3575 0.251 Uiso 0.50 1 calc PR . . 
H8C H -0.2594 -0.0301 0.3575 0.251 Uiso 0.50 1 calc PR . . 
 
loop_ 
 _atom_site_aniso_label 
 _atom_site_aniso_U_11 
 _atom_site_aniso_U_22 
 _atom_site_aniso_U_33 
 _atom_site_aniso_U_23 
 _atom_site_aniso_U_13 
 _atom_site_aniso_U_12 
Dy1 0.0264(9) 0.0708(12) 0.0631(13) 0.000 0.000 0.000 
Dy1' 0.104(3) 0.519(11) 0.058(2) 0.000 0.000 0.000 
S1 0.111(4) 0.139(8) 0.111(4) 0.000 0.000 0.000 
O1 0.84(6) 0.142(13) 0.114(11) -0.066(10) 0.000 0.000 
O2 0.100(6) 0.199(9) 0.159(8) 0.059(6) -0.075(6) -0.063(5) 
O3 0.42(9) 0.125(18) 0.125(18) 0.000 0.000 0.000 
N1 0.122(7) 0.122(7) 0.138(11) 0.076(7) -0.076(7) -0.081(8) 
C1 0.126(10) 0.175(12) 0.148(11) 0.087(10) -0.079(9) -0.073(9) 
C2 0.096(10) 0.125(8) 0.125(8) 0.060(10) -0.062(8) -0.062(8) 
C3 0.105(11) 0.128(9) 0.128(9) 0.053(11) -0.053(8) -0.053(8) 
C4 0.135(10) 0.156(11) 0.155(11) 0.088(9) -0.089(9) -0.092(10) 
C6 0.083(11) 0.126(8) 0.126(8) 0.024(11) -0.037(7) -0.037(7) 
C7 0.095(11) 0.139(9) 0.139(9) 0.078(11) -0.068(9) -0.068(9) 
O6 0.180(16) 0.73(9) 0.180(16) 0.000 0.08(2) 0.000 
S2 0.136(5) 0.56(3) 0.136(5) 0.000 0.004(7) 0.000 
O4 0.024(7) 0.078(6) 0.078(6) 0.000 0.000 0.000 
C8 0.144(17) 0.19(2) 0.17(2) 0.000 0.004(15) 0.000 
 
_geom_special_details 
; 
 All esds (except the esd in the dihedral angle between two l.s. planes) 
 are estimated using the full covariance matrix.  The cell esds are taken 
 into account individually in the estimation of esds in distances, angles 
 and torsion angles; correlations between esds in cell parameters are only 
 used when they are defined by crystal symmetry.  An approximate (isotropic) 
 treatment of cell esds is used for estimating esds involving l.s. planes. 
; 
 
loop_ 
 _geom_bond_atom_site_label_1 
 _geom_bond_atom_site_label_2 
 _geom_bond_distance 
 _geom_bond_site_symmetry_2 
 _geom_bond_publ_flag 
Dy1 O2 2.231(8) . ? 
Dy1 O1 2.327(19) 82_454 ? 
Dy1' O2 2.214(8) . ? 
Dy1' O3 2.895(8) . ? 
S1 O1 1.334(13) . ? 
O1 Dy1 2.327(19) 80_455 ? 
O2 C6 1.256(10) . ? 
O3 Dy1' 2.895(8) 5 ? 
N1 C3 1.345(18) . ? 
C1 C7 1.349(13) . ? 
C1 C4 1.388(14) . ? 
C1 H1A 0.9400 . ? 
C2 C4 1.345(11) . ? 
C2 C3 1.489(17) . ? 
C4 H4A 0.9400 . ? 
C6 O2 1.256(10) 70 ? 
C6 C7 1.44(2) . ? 
O6 S2 1.28(3) . ? 
S2 C8 1.60(2) . ? 
C8 H8A 0.9700 . ? 
C8 H8B 0.9700 . ? 
C8 H8C 0.9700 . ? 
 
loop_ 
 _geom_angle_atom_site_label_1 
 _geom_angle_atom_site_label_2 
 _geom_angle_atom_site_label_3 
 _geom_angle 
 _geom_angle_site_symmetry_1 
 _geom_angle_site_symmetry_3 
 _geom_angle_publ_flag 
O2 Dy1 O2 159.4(5) . 9_455 ? 
O2 Dy1 O2 83.6(5) . 54_455 ? 
O2 Dy1 O2 92.8(5) 9_455 54_455 ? 
O2 Dy1 O2 92.8(5) . 51 ? 
O2 Dy1 O2 83.6(5) 9_455 51 ? 
O2 Dy1 O2 159.4(5) 54_455 51 ? 
O2 Dy1 O1 83.1(3) . 82_454 ? 
O2 Dy1 O1 116.4(3) 9_455 82_454 ? 
O2 Dy1 O1 116.4(3) 54_455 82_454 ? 
O2 Dy1 O1 83.1(3) 51 82_454 ? 
O2 Dy1 O1 116.4(3) . 80_455 ? 
O2 Dy1 O1 83.1(3) 9_455 80_455 ? 
O2 Dy1 O1 83.1(3) 54_455 80_455 ? 
O2 Dy1 O1 116.4(3) 51 80_455 ? 
O1 Dy1 O1 50.1(7) 82_454 80_455 ? 
O2 Dy1 S1 100.3(2) . . ? 
O2 Dy1 S1 100.3(2) 9_455 . ? 
O2 Dy1 S1 100.3(2) 54_455 . ? 
O2 Dy1 S1 100.3(2) 51 . ? 
O1 Dy1 S1 25.1(3) 82_454 . ? 
O1 Dy1 S1 25.1(3) 80_455 . ? 
O2 Dy1' O2 165.0(6) . 9_455 ? 
O2 Dy1' O2 84.3(5) . 54_455 ? 
O2 Dy1' O2 93.7(5) 9_455 54_455 ? 
O2 Dy1' O2 93.7(5) . 51 ? 
O2 Dy1' O2 84.3(5) 9_455 51 ? 
O2 Dy1' O2 165.0(6) 54_455 51 ? 
O2 Dy1' O3 97.5(3) . . ? 
O2 Dy1' O3 97.5(3) 9_455 . ? 
O2 Dy1' O3 97.5(3) 54_455 . ? 
O2 Dy1' O3 97.5(3) 51 . ? 
O1 S1 O1 117.0(9) 80_455 . ? 
O1 S1 O1 95.3(16) 80_455 82_454 ? 
O1 S1 O1 117.0(9) . 82_454 ? 
O1 S1 O1 117.0(9) 80_455 51 ? 
O1 S1 O1 95.3(16) . 51 ? 
O1 S1 O1 117.0(9) 82_454 51 ? 
O1 S1 Dy1 47.7(8) 80_455 . ? 
O1 S1 Dy1 132.3(8) . . ? 
O1 S1 Dy1 47.7(8) 82_454 . ? 
O1 S1 Dy1 132.3(8) 51 . ? 
O1 S1 Dy1 132.3(8) 80_455 80_455 ? 
O1 S1 Dy1 47.7(8) . 80_455 ? 
O1 S1 Dy1 132.3(8) 82_454 80_455 ? 
O1 S1 Dy1 47.7(8) 51 80_455 ? 
Dy1 S1 Dy1 180.0 . 80_455 ? 
S1 O1 Dy1 107.3(10) . 80_455 ? 
C6 O2 Dy1' 142.9(9) . . ? 
C6 O2 Dy1 157.3(8) . . ? 
Dy1' O3 Dy1' 90.0 53_455 . ? 
Dy1' O3 Dy1' 90.0 53_455 49_455 ? 
Dy1' O3 Dy1' 180.0 . 49_455 ? 
Dy1' O3 Dy1' 180.0 53_455 5 ? 
Dy1' O3 Dy1' 90.0 . 5 ? 
Dy1' O3 Dy1' 90.0 49_455 5 ? 
C3 N1 C3 113.5(13) 16 . ? 
C7 C1 C4 121.3(10) . . ? 
C7 C1 H1A 119.3 . . ? 
C4 C1 H1A 119.3 . . ? 
C4 C2 C4 119.1(12) 70 . ? 
C4 C2 C3 120.4(6) 70 . ? 
C4 C2 C3 120.4(6) . . ? 
N1 C3 N1 126.5(13) 15 . ? 
N1 C3 C2 116.8(6) 15 . ? 
N1 C3 C2 116.8(6) . . ? 
C2 C4 C1 120.2(10) . . ? 
C2 C4 H4A 119.9 . . ? 
C1 C4 H4A 119.9 . . ? 
O2 C6 O2 124.0(14) 70 . ? 
O2 C6 C7 118.0(7) 70 . ? 
O2 C6 C7 118.0(7) . . ? 
C1 C7 C1 117.7(13) 70 . ? 
C1 C7 C6 121.1(7) 70 . ? 
C1 C7 C6 121.1(7) . . ? 
O6 S2 C8 125.6(8) . 71 ? 
O6 S2 C8 125.6(8) . . ? 
C8 S2 C8 108.9(17) 71 . ? 
S2 C8 H8A 109.5 . . ? 
S2 C8 H8B 109.5 . . ? 
H8A C8 H8B 109.5 . . ? 
S2 C8 H8C 109.5 . . ? 
H8A C8 H8C 109.5 . . ? 
H8B C8 H8C 109.5 . . ? 
 
loop_ 
 _geom_torsion_atom_site_label_1 
 _geom_torsion_atom_site_label_2 
 _geom_torsion_atom_site_label_3 
 _geom_torsion_atom_site_label_4 
 _geom_torsion 
 _geom_torsion_site_symmetry_1 
 _geom_torsion_site_symmetry_2 
 _geom_torsion_site_symmetry_3 
 _geom_torsion_site_symmetry_4 
 _geom_torsion_publ_flag 
O2 Dy1 S1 O1 -132.6(2) . . . 80_455 ? 
O2 Dy1 S1 O1 47.4(2) 9_455 . . 80_455 ? 
O2 Dy1 S1 O1 -47.4(2) 54_455 . . 80_455 ? 
O2 Dy1 S1 O1 132.6(2) 51 . . 80_455 ? 
O1 Dy1 S1 O1 180.0 82_454 . . 80_455 ? 
O2 Dy1 S1 O1 -42.6(2) . . . . ? 
O2 Dy1 S1 O1 137.4(2) 9_455 . . . ? 
O2 Dy1 S1 O1 42.6(2) 54_455 . . . ? 
O2 Dy1 S1 O1 -137.4(2) 51 . . . ? 
O1 Dy1 S1 O1 -90.0 82_454 . . . ? 
O1 Dy1 S1 O1 90.000(1) 80_455 . . . ? 
O2 Dy1 S1 O1 47.4(2) . . . 82_454 ? 
O2 Dy1 S1 O1 -132.6(2) 9_455 . . 82_454 ? 
O2 Dy1 S1 O1 132.6(2) 54_455 . . 82_454 ? 
O2 Dy1 S1 O1 -47.4(2) 51 . . 82_454 ? 
O1 Dy1 S1 O1 180.0 80_455 . . 82_454 ? 
O2 Dy1 S1 O1 137.4(2) . . . 51 ? 
O2 Dy1 S1 O1 -42.6(2) 9_455 . . 51 ? 
O2 Dy1 S1 O1 -137.4(2) 54_455 . . 51 ? 
O2 Dy1 S1 O1 42.6(2) 51 . . 51 ? 
O1 Dy1 S1 O1 90.000(1) 82_454 . . 51 ? 
O1 Dy1 S1 O1 -90.000(1) 80_455 . . 51 ? 
O2 Dy1 S1 Dy1 47.4(2) . . . 80_455 ? 
O2 Dy1 S1 Dy1 -132.6(2) 9_455 . . 80_455 ? 
O2 Dy1 S1 Dy1 132.6(2) 54_455 . . 80_455 ? 
O2 Dy1 S1 Dy1 -47.4(2) 51 . . 80_455 ? 
O1 Dy1 S1 Dy1 0.0 82_454 . . 80_455 ? 
O1 Dy1 S1 Dy1 180.0 80_455 . . 80_455 ? 
O1 S1 O1 Dy1 -124.0(4) 80_455 . . 80_455 ? 
O1 S1 O1 Dy1 124.0(4) 82_454 . . 80_455 ? 
O1 S1 O1 Dy1 0.0 51 . . 80_455 ? 
Dy1 S1 O1 Dy1 180.0 . . . 80_455 ? 
O2 Dy1' O2 C6 152.4(19) 9_455 . . . ? 
O2 Dy1' O2 C6 69(2) 54_455 . . . ? 
O2 Dy1' O2 C6 -125.7(18) 51 . . . ? 
O3 Dy1' O2 C6 -27.6(19) . . . . ? 
O2 Dy1 O2 C6 -46(3) 9_455 . . . ? 
O2 Dy1 O2 C6 34(3) 54_455 . . . ? 
O2 Dy1 O2 C6 -126(3) 51 . . . ? 
O1 Dy1 O2 C6 152(3) 82_454 . . . ? 
O1 Dy1 O2 C6 113(3) 80_455 . . . ? 
S1 Dy1 O2 C6 134(3) . . . . ? 
O2 Dy1' O3 Dy1' -137.4(2) . . . 53_455 ? 
O2 Dy1' O3 Dy1' 42.6(2) 9_455 . . 53_455 ? 
O2 Dy1' O3 Dy1' 137.4(2) 54_455 . . 53_455 ? 
O2 Dy1' O3 Dy1' -42.6(2) 51 . . 53_455 ? 
O2 Dy1' O3 Dy1' 0(100) . . . 49_455 ? 
O2 Dy1' O3 Dy1' 0(100) 9_455 . . 49_455 ? 
O2 Dy1' O3 Dy1' 0(100) 54_455 . . 49_455 ? 
O2 Dy1' O3 Dy1' 0.0 51 . . 49_455 ? 
O2 Dy1' O3 Dy1' 42.6(2) . . . 5 ? 
O2 Dy1' O3 Dy1' -137.4(2) 9_455 . . 5 ? 
O2 Dy1' O3 Dy1' -42.6(2) 54_455 . . 5 ? 
O2 Dy1' O3 Dy1' 137.4(2) 51 . . 5 ? 
C3 N1 C3 N1 2(4) 16 . . 15 ? 
C3 N1 C3 C2 -178.1(12) 16 . . . ? 
C4 C2 C3 N1 0(3) 70 . . 15 ? 
C4 C2 C3 N1 179.7(19) . . . 15 ? 
C4 C2 C3 N1 -179.7(19) 70 . . . ? 
C4 C2 C3 N1 0(3) . . . . ? 
C4 C2 C4 C1 0(4) 70 . . . ? 
C3 C2 C4 C1 -179.6(18) . . . . ? 
C7 C1 C4 C2 -2(3) . . . . ? 
Dy1' O2 C6 O2 -8(3) . . . 70 ? 
Dy1 O2 C6 O2 13(5) . . . 70 ? 
Dy1' O2 C6 C7 172.2(12) . . . . ? 
Dy1 O2 C6 C7 -166(2) . . . . ? 
C4 C1 C7 C1 5(3) . . . 70 ? 
C4 C1 C7 C6 -178.9(18) . . . . ? 
O2 C6 C7 C1 -2(3) 70 . . 70 ? 
O2 C6 C7 C1 177.8(18) . . . 70 ? 
O2 C6 C7 C1 -177.8(18) 70 . . . ? 
O2 C6 C7 C1 2(3) . . . . ? 
 
_diffrn_measured_fraction_theta_max    0.996 
_diffrn_reflns_theta_full              20.81 
_diffrn_measured_fraction_theta_full   0.996 
_refine_diff_density_max    1.240 
_refine_diff_density_min   -0.594 
_refine_diff_density_rms    0.110 

#end

 
data_PCN_17_Er 
 
_audit_creation_method            SHELXL-97 
_chemical_name_systematic 
; 
 ? 
; 
_chemical_name_common             'PCN-17 (Er)' 
_chemical_melting_point           'NOT MEASURED' 
_chemical_formula_moiety          
'Er4 (H2O) (SO4)2 (C24H12N3O6)8/3 4(C2H6SO) 2(H2O)' 
_chemical_formula_sum 
 'C72 H62 Er4 N8 O31 S6' 
_chemical_formula_weight          2396.70 
 
loop_ 
 _atom_type_symbol 
 _atom_type_description 
 _atom_type_scat_dispersion_real 
 _atom_type_scat_dispersion_imag 
 _atom_type_scat_source 
 'C'  'C'   0.0033   0.0016 
 'International Tables Vol C Tables 4.2.6.8 and 6.1.1.4' 
 'H'  'H'   0.0000   0.0000 
 'International Tables Vol C Tables 4.2.6.8 and 6.1.1.4' 
 'N'  'N'   0.0061   0.0033 
 'International Tables Vol C Tables 4.2.6.8 and 6.1.1.4' 
 'O'  'O'   0.0106   0.0060 
 'International Tables Vol C Tables 4.2.6.8 and 6.1.1.4' 
 'S'  'S'   0.1246   0.1234 
 'International Tables Vol C Tables 4.2.6.8 and 6.1.1.4' 
 'Er'  'Er'  -0.2586   4.9576 
 'International Tables Vol C Tables 4.2.6.8 and 6.1.1.4' 
 
_symmetry_cell_setting            Cubic 
_symmetry_space_group_name_H-M    Im-3m 
 
loop_ 
 _symmetry_equiv_pos_as_xyz 
 'x, y, z' 
 '-y, x, z' 
 '-x, -y, z' 
 'y, -x, z' 
 'x, -z, y' 
 'x, -y, -z' 
 'x, z, -y' 
 'z, y, -x' 
 '-x, y, -z' 
 '-z, y, x' 
 'z, x, y' 
 'y, z, x' 
 '-y, -z, x' 
 'z, -x, -y' 
 '-y, z, -x' 
 '-z, -x, y' 
 '-z, x, -y' 
 'y, -z, -x' 
 'y, x, -z' 
 '-y, -x, -z' 
 '-x, z, y' 
 '-x, -z, -y' 
 'z, -y, x' 
 '-z, -y, -x' 
 'x+1/2, y+1/2, z+1/2' 
 '-y+1/2, x+1/2, z+1/2' 
 '-x+1/2, -y+1/2, z+1/2' 
 'y+1/2, -x+1/2, z+1/2' 
 'x+1/2, -z+1/2, y+1/2' 
 'x+1/2, -y+1/2, -z+1/2' 
 'x+1/2, z+1/2, -y+1/2' 
 'z+1/2, y+1/2, -x+1/2' 
 '-x+1/2, y+1/2, -z+1/2' 
 '-z+1/2, y+1/2, x+1/2' 
 'z+1/2, x+1/2, y+1/2' 
 'y+1/2, z+1/2, x+1/2' 
 '-y+1/2, -z+1/2, x+1/2' 
 'z+1/2, -x+1/2, -y+1/2' 
 '-y+1/2, z+1/2, -x+1/2' 
 '-z+1/2, -x+1/2, y+1/2' 
 '-z+1/2, x+1/2, -y+1/2' 
 'y+1/2, -z+1/2, -x+1/2' 
 'y+1/2, x+1/2, -z+1/2' 
 '-y+1/2, -x+1/2, -z+1/2' 
 '-x+1/2, z+1/2, y+1/2' 
 '-x+1/2, -z+1/2, -y+1/2' 
 'z+1/2, -y+1/2, x+1/2' 
 '-z+1/2, -y+1/2, -x+1/2' 
 '-x, -y, -z' 
 'y, -x, -z' 
 'x, y, -z' 
 '-y, x, -z' 
 '-x, z, -y' 
 '-x, y, z' 
 '-x, -z, y' 
 '-z, -y, x' 
 'x, -y, z' 
 'z, -y, -x' 
 '-z, -x, -y' 
 '-y, -z, -x' 
 'y, z, -x' 
 '-z, x, y' 
 'y, -z, x' 
 'z, x, -y' 
 'z, -x, y' 
 '-y, z, x' 
 '-y, -x, z' 
 'y, x, z' 
 'x, -z, -y' 
 'x, z, y' 
 '-z, y, -x' 
 'z, y, x' 
 '-x+1/2, -y+1/2, -z+1/2' 
 'y+1/2, -x+1/2, -z+1/2' 
 'x+1/2, y+1/2, -z+1/2' 
 '-y+1/2, x+1/2, -z+1/2' 
 '-x+1/2, z+1/2, -y+1/2' 
 '-x+1/2, y+1/2, z+1/2' 
 '-x+1/2, -z+1/2, y+1/2' 
 '-z+1/2, -y+1/2, x+1/2' 
 'x+1/2, -y+1/2, z+1/2' 
 'z+1/2, -y+1/2, -x+1/2' 
 '-z+1/2, -x+1/2, -y+1/2' 
 '-y+1/2, -z+1/2, -x+1/2' 
 'y+1/2, z+1/2, -x+1/2' 
 '-z+1/2, x+1/2, y+1/2' 
 'y+1/2, -z+1/2, x+1/2' 
 'z+1/2, x+1/2, -y+1/2' 
 'z+1/2, -x+1/2, y+1/2' 
 '-y+1/2, z+1/2, x+1/2' 
 '-y+1/2, -x+1/2, z+1/2' 
 'y+1/2, x+1/2, z+1/2' 
 'x+1/2, -z+1/2, -y+1/2' 
 'x+1/2, z+1/2, y+1/2' 
 '-z+1/2, y+1/2, -x+1/2' 
 'z+1/2, y+1/2, x+1/2' 
 
_cell_length_a                    26.268(4) 
_cell_length_b                    26.268(4) 
_cell_length_c                    26.268(4) 
_cell_angle_alpha                 90.00 
_cell_angle_beta                  90.00 
_cell_angle_gamma                 90.00 
_cell_volume                      18126(5) 
_cell_formula_units_Z             6 
_cell_measurement_temperature     213(2) 
_cell_measurement_reflns_used     8825 
_cell_measurement_theta_min       2.452 
_cell_measurement_theta_max       21.098 
 
_exptl_crystal_description        block 
_exptl_crystal_colour             yellow 
_exptl_crystal_size_max           0.23 
_exptl_crystal_size_mid           0.21 
_exptl_crystal_size_min           0.18 
_exptl_crystal_density_meas       none 
_exptl_crystal_density_diffrn     1.317 
_exptl_crystal_density_method     'not measured' 
_exptl_crystal_F_000              6996 
_exptl_absorpt_coefficient_mu     2.914 
_exptl_absorpt_correction_type    empirical 
_exptl_absorpt_correction_T_min   0.517 
_exptl_absorpt_correction_T_max   0.592 
_exptl_absorpt_process_details    SADABS 
 
_exptl_special_details 
; 
 ? 
; 
 
_diffrn_ambient_temperature       213(2) 
_diffrn_radiation_wavelength      0.71073 
_diffrn_radiation_type            MoK\a 
_diffrn_radiation_source          'fine-focus sealed tube' 
_diffrn_radiation_monochromator   graphite 
_diffrn_measurement_device_type   'CCD area detector' 
_diffrn_measurement_method        'phi and omega scans'  
_diffrn_detector_area_resol_mean  ? 
_diffrn_standards_number          ? 
_diffrn_standards_interval_count  ? 
_diffrn_standards_interval_time   ? 
_diffrn_standards_decay_%         ? 
_diffrn_reflns_number             41384 
_diffrn_reflns_av_R_equivalents   0.0415 
_diffrn_reflns_av_sigmaI/netI     0.0147 
_diffrn_reflns_limit_h_min        -24 
_diffrn_reflns_limit_h_max        31 
_diffrn_reflns_limit_k_min        -31 
_diffrn_reflns_limit_k_max        29 
_diffrn_reflns_limit_l_min        -30 
_diffrn_reflns_limit_l_max        31 
_diffrn_reflns_theta_min          1.90 
_diffrn_reflns_theta_max          24.97 
_reflns_number_total              1564 
_reflns_number_gt                 1300 
_reflns_threshold_expression      >2sigma(I) 
 
_computing_data_collection        'Bruker SMART' 
_computing_cell_refinement        'Bruker SMART' 
_computing_data_reduction         'Bruker SMART'
_computing_structure_solution     'SHELXS-97 (Sheldrick, 1990)' 
_computing_structure_refinement   'SHELXL-97 (Sheldrick, 1997)' 
_computing_molecular_graphics     'Bruker SHELXTL'  
_computing_publication_material   'Bruker SHELXTL'  
 
_refine_special_details 
; 
 Refinement of F^2^ against ALL reflections.  The weighted R-factor wR and 
 goodness of fit S are based on F^2^, conventional R-factors R are based 
 on F, with F set to zero for negative F^2^. The threshold expression of 
 F^2^ > 2sigma(F^2^) is used only for calculating R-factors(gt) etc. and is 
 not relevant to the choice of reflections for refinement.  R-factors based 
 on F^2^ are statistically about twice as large as those based on F, and R- 
 factors based on ALL data will be even larger. 
; 
 
_refine_ls_structure_factor_coef  Fsqd  
_refine_ls_matrix_type            full 
_refine_ls_weighting_scheme       calc  
_refine_ls_weighting_details 
 'calc w=1/[\s^2^(Fo^2^)+(0.1193P)^2^+227.6702P] where P=(Fo^2^+2Fc^2^)/3' 
_atom_sites_solution_primary      direct 
_atom_sites_solution_secondary    difmap 
_atom_sites_solution_hydrogens    geom 
_refine_ls_hydrogen_treatment     constr 
_refine_ls_extinction_method      none 
_refine_ls_extinction_coef        ? 
_refine_ls_number_reflns          1564 
_refine_ls_number_parameters      93 
_refine_ls_number_restraints      0 
_refine_ls_R_factor_all           0.1065 
_refine_ls_R_factor_gt            0.0947 
_refine_ls_wR_factor_ref          0.2635 
_refine_ls_wR_factor_gt           0.2529 
_refine_ls_goodness_of_fit_ref    1.103 
_refine_ls_restrained_S_all       1.103 
_refine_ls_shift/su_max           0.000 
_refine_ls_shift/su_mean          0.000 
 
loop_ 
 _atom_site_label 
 _atom_site_type_symbol 
 _atom_site_fract_x 
 _atom_site_fract_y 
 _atom_site_fract_z 
 _atom_site_U_iso_or_equiv 
 _atom_site_adp_type 
 _atom_site_occupancy 
 _atom_site_symmetry_multiplicity 
 _atom_site_calc_flag 
 _atom_site_refinement_flags 
 _atom_site_disorder_assembly 
 _atom_site_disorder_group 
Er1' Er -0.5000 0.1058(3) 0.0000 0.182(3) Uani 0.50 4 d SP . . 
Er1 Er -0.5000 0.13814(8) 0.0000 0.0609(6) Uani 0.50 4 d SP . . 
S1 S -0.5000 0.2500 0.0000 0.128(4) Uani 1 8 d S . . 
O1 O -0.5000 0.2911(12) 0.0361(10) 0.43(3) Uani 1 2 d S . . 
O2 O -0.4446(4) 0.1231(5) 0.0617(5) 0.166(5) Uani 1 1 d . . . 
O3 O -0.5000 0.0000 0.0000 0.33(5) Uani 1 16 d S . . 
N1 N -0.2347(6) 0.2347(6) 0.1713(8) 0.172(10) Uani 1 2 d S . . 
C1 C -0.3602(6) 0.1660(7) 0.1031(6) 0.163(8) Uani 1 1 d . . . 
H1A H -0.3739 0.1804 0.0734 0.196 Uiso 1 1 calc R . . 
C2 C -0.2961(8) 0.1667(7) 0.1667(7) 0.139(9) Uani 1 2 d S . . 
C3 C -0.2515(8) 0.1931(7) 0.1931(7) 0.134(9) Uani 1 2 d S . . 
C4 C -0.3188(6) 0.1886(7) 0.1255(6) 0.166(9) Uani 1 1 d . . . 
H4A H -0.3059 0.2193 0.1124 0.199 Uiso 1 1 calc R . . 
C6 C -0.4251(7) 0.1019(7) 0.1019(7) 0.130(7) Uani 1 2 d S . . 
C7 C -0.3820(8) 0.1229(7) 0.1229(7) 0.144(10) Uani 1 2 d S . . 
O6 O -0.2528(7) 0.0000 0.2528(7) 0.29(2) Uani 1 4 d S . . 
S2 S -0.2873(4) 0.0000 0.2873(4) 0.288(11) Uani 1 4 d S . . 
O4 O -0.1613(4) 0.0000 0.0000 0.071(5) Uani 1 8 d S . . 
C8 C -0.2711(13) 0.0000 0.3563(12) 0.228(18) Uani 1 2 d S . . 
H8A H -0.3022 0.0000 0.3762 0.342 Uiso 1 2 calc SR . . 
H8B H -0.2513 0.0302 0.3643 0.342 Uiso 0.50 1 calc PR . . 
H8C H -0.2513 -0.0302 0.3643 0.342 Uiso 0.50 1 calc PR . . 
 
loop_ 
 _atom_site_aniso_label 
 _atom_site_aniso_U_11 
 _atom_site_aniso_U_22 
 _atom_site_aniso_U_33 
 _atom_site_aniso_U_23 
 _atom_site_aniso_U_13 
 _atom_site_aniso_U_12 
Er1' 0.111(3) 0.341(8) 0.095(2) 0.000 0.000 0.000 
Er1 0.0223(7) 0.0829(13) 0.0773(12) 0.000 0.000 0.000 
S1 0.109(5) 0.167(11) 0.109(5) 0.000 0.000 0.000 
O1 0.79(8) 0.28(3) 0.21(2) -0.19(2) 0.000 0.000 
O2 0.091(7) 0.242(14) 0.163(10) 0.036(9) -0.059(7) -0.051(7) 
O3 0.46(16) 0.26(5) 0.26(5) 0.000 0.000 0.000 
N1 0.164(12) 0.164(12) 0.188(18) 0.109(13) -0.109(13) -0.108(14) 
C1 0.124(12) 0.193(17) 0.172(14) 0.090(13) -0.092(11) -0.075(12) 
C2 0.112(13) 0.152(12) 0.152(12) 0.080(14) -0.080(11) -0.080(11) 
C3 0.124(15) 0.139(12) 0.139(12) 0.076(14) -0.057(11) -0.057(11) 
C4 0.161(15) 0.167(15) 0.169(15) 0.094(12) -0.086(12) -0.102(13) 
C6 0.078(12) 0.156(12) 0.156(12) 0.005(16) -0.033(9) -0.033(9) 
C7 0.104(14) 0.164(13) 0.164(13) 0.066(16) -0.074(12) -0.074(12) 
O6 0.161(17) 0.54(7) 0.161(17) 0.000 0.09(2) 0.000 
S2 0.167(7) 0.53(4) 0.167(7) 0.000 0.025(10) 0.000 
O4 0.009(6) 0.102(8) 0.102(8) 0.000 0.000 0.000 
C8 0.28(4) 0.18(3) 0.23(3) 0.000 0.17(3) 0.000 
 
_geom_special_details 
; 
 All esds (except the esd in the dihedral angle between two l.s. planes) 
 are estimated using the full covariance matrix.  The cell esds are taken 
 into account individually in the estimation of esds in distances, angles 
 and torsion angles; correlations between esds in cell parameters are only 
 used when they are defined by crystal symmetry.  An approximate (isotropic) 
 treatment of cell esds is used for estimating esds involving l.s. planes. 
; 
 
loop_ 
 _geom_bond_atom_site_label_1 
 _geom_bond_atom_site_label_2 
 _geom_bond_distance 
 _geom_bond_site_symmetry_2 
 _geom_bond_publ_flag 
Er1' O2 2.226(10) . ? 
Er1' O3 2.779(8) . ? 
Er1' O1 2.87(4) 82_454 ? 
Er1 O1 2.09(4) 82_454 ? 
Er1 O2 2.215(10) . ? 
S1 O1 1.437(18) . ? 
O2 C6 1.298(13) . ? 
N1 C3 1.31(3) . ? 
C1 C7 1.371(17) . ? 
C1 C4 1.372(18) . ? 
C1 H1A 0.9400 . ? 
C2 C4 1.362(14) 70 ? 
C2 C4 1.362(14) . ? 
C2 C3 1.53(2) . ? 
C4 H4A 0.9400 . ? 
C6 O2 1.298(13) 70 ? 
C6 C7 1.38(3) . ? 
C7 C1 1.371(17) 70 ? 
O6 S2 1.28(3) . ? 
S2 C8 1.86(4) . ? 
C8 H8A 0.9700 . ? 
C8 H8B 0.9700 . ? 
C8 H8C 0.9700 . ? 
 
loop_ 
 _geom_angle_atom_site_label_1 
 _geom_angle_atom_site_label_2 
 _geom_angle_atom_site_label_3 
 _geom_angle 
 _geom_angle_site_symmetry_1 
 _geom_angle_site_symmetry_3 
 _geom_angle_publ_flag 
O2 Er1' O2 156.4(8) 9_455 . ? 
O2 Er1' O2 93.5(6) 9_455 54_455 ? 
O2 Er1' O2 81.7(7) . 54_455 ? 
O2 Er1' O2 81.7(7) 9_455 51 ? 
O2 Er1' O2 93.5(6) . 51 ? 
O2 Er1' O2 156.4(8) 54_455 51 ? 
O2 Er1' O3 101.8(4) 9_455 . ? 
O2 Er1' O3 101.8(4) . . ? 
O2 Er1' O3 101.8(4) 54_455 . ? 
O2 Er1' O3 101.8(4) 51 . ? 
O2 Er1' O1 91.3(5) 9_455 82_454 ? 
O2 Er1' O1 65.8(4) . 82_454 ? 
O2 Er1' O1 91.3(5) 54_455 82_454 ? 
O2 Er1' O1 65.8(4) 51 82_454 ? 
O3 Er1' O1 160.7(4) . 82_454 ? 
O2 Er1' O1 65.8(4) 9_455 80_455 ? 
O2 Er1' O1 91.3(5) . 80_455 ? 
O2 Er1' O1 65.8(4) 54_455 80_455 ? 
O2 Er1' O1 91.3(5) 51 80_455 ? 
O3 Er1' O1 160.7(4) . 80_455 ? 
O1 Er1' O1 38.6(8) 82_454 80_455 ? 
O2 Er1' Er1' 68.3(3) 9_455 53_455 ? 
O2 Er1' Er1' 131.3(4) . 53_455 ? 
O2 Er1' Er1' 131.3(4) 54_455 53_455 ? 
O2 Er1' Er1' 68.3(3) 51 53_455 ? 
O3 Er1' Er1' 45.0 . 53_455 ? 
O1 Er1' Er1' 131.86(13) 82_454 53_455 ? 
O1 Er1' Er1' 131.86(13) 80_455 53_455 ? 
Er1 Er1' Er1' 135.0 . 5 ? 
O2 Er1' Er1' 131.3(4) 9_455 5 ? 
O2 Er1' Er1' 68.3(3) . 5 ? 
O2 Er1' Er1' 68.3(3) 54_455 5 ? 
O2 Er1' Er1' 131.3(4) 51 5 ? 
O3 Er1' Er1' 45.0 . 5 ? 
O1 Er1' Er1' 131.86(13) 82_454 5 ? 
O1 Er1' Er1' 131.86(13) 80_455 5 ? 
O1 Er1 O1 54.1(10) 82_454 80_455 ? 
O1 Er1 O2 117.2(5) 82_454 9_455 ? 
O1 Er1 O2 81.9(5) 80_455 9_455 ? 
O1 Er1 O2 81.9(5) 82_454 . ? 
O1 Er1 O2 117.2(5) 80_455 . ? 
O2 Er1 O2 159.5(7) 9_455 . ? 
O1 Er1 O2 117.2(5) 82_454 54_455 ? 
O1 Er1 O2 81.9(5) 80_455 54_455 ? 
O2 Er1 O2 94.1(7) 9_455 54_455 ? 
O2 Er1 O2 82.2(6) . 54_455 ? 
O1 Er1 O2 81.9(5) 82_454 51 ? 
O1 Er1 O2 117.2(5) 80_455 51 ? 
O2 Er1 O2 82.2(6) 9_455 51 ? 
O2 Er1 O2 94.1(7) . 51 ? 
O2 Er1 O2 159.5(7) 54_455 51 ? 
O1 S1 O1 124.3(18) 80_455 . ? 
O1 S1 O1 83(3) 80_455 82_454 ? 
O1 S1 O1 124.3(18) . 82_454 ? 
O1 S1 O1 124.3(18) 80_455 51 ? 
O1 S1 O1 83(3) . 51 ? 
O1 S1 O1 124.3(18) 82_454 51 ? 
C6 O2 Er1 158.5(11) . . ? 
C6 O2 Er1' 139.6(12) . . ? 
Er1 O2 Er1' 22.1(2) . . ? 
Er1' O3 Er1' 90.0 53_455 . ? 
Er1' O3 Er1' 90.0 53_455 49_455 ? 
Er1' O3 Er1' 180.0 . 49_455 ? 
Er1' O3 Er1' 180.0 53_455 5 ? 
Er1' O3 Er1' 90.0 . 5 ? 
Er1' O3 Er1' 90.0 49_455 5 ? 
C3 N1 C3 111.8(18) . 16 ? 
C7 C1 C4 121.6(13) . . ? 
C7 C1 H1A 119.2 . . ? 
C4 C1 H1A 119.2 . . ? 
C4 C2 C4 118.6(15) 70 . ? 
C4 C2 C3 120.3(8) 70 . ? 
C4 C2 C3 120.3(8) . . ? 
N1 C3 N1 128.0(18) . 15 ? 
N1 C3 C2 116.0(9) . . ? 
N1 C3 C2 116.0(9) 15 . ? 
C2 C4 C1 120.4(13) . . ? 
C2 C4 H4A 119.8 . . ? 
C1 C4 H4A 119.8 . . ? 
O2 C6 O2 122.8(18) . 70 ? 
O2 C6 C7 118.6(9) . . ? 
O2 C6 C7 118.6(9) 70 . ? 
C1 C7 C1 116.9(16) . 70 ? 
C1 C7 C6 121.5(8) . . ? 
C1 C7 C6 121.5(8) 70 . ? 
O6 S2 C8 121.8(11) . . ? 
O6 S2 C8 121.8(11) . 71 ? 
C8 S2 C8 116(2) . 71 ? 
S2 C8 H8A 109.5 . . ? 
S2 C8 H8B 109.5 . . ? 
H8A C8 H8B 109.5 . . ? 
S2 C8 H8C 109.5 . . ? 
H8A C8 H8C 109.5 . . ? 
H8B C8 H8C 109.5 . . ? 
 
loop_ 
 _geom_torsion_atom_site_label_1 
 _geom_torsion_atom_site_label_2 
 _geom_torsion_atom_site_label_3 
 _geom_torsion_atom_site_label_4 
 _geom_torsion 
 _geom_torsion_site_symmetry_1 
 _geom_torsion_site_symmetry_2 
 _geom_torsion_site_symmetry_3 
 _geom_torsion_site_symmetry_4 
 _geom_torsion_publ_flag 
O1 Er1 S1 O1 180.0 82_454 . . 80_455 ? 
O2 Er1 S1 O1 48.1(3) 9_455 . . 80_455 ? 
O2 Er1 S1 O1 -131.9(3) . . . 80_455 ? 
O2 Er1 S1 O1 -48.1(3) 54_455 . . 80_455 ? 
O2 Er1 S1 O1 131.9(3) 51 . . 80_455 ? 
O1 Er1 S1 O1 -90.000(1) 82_454 . . . ? 
O1 Er1 S1 O1 90.000(1) 80_455 . . . ? 
O2 Er1 S1 O1 138.1(3) 9_455 . . . ? 
O2 Er1 S1 O1 -41.9(3) . . . . ? 
O2 Er1 S1 O1 41.9(3) 54_455 . . . ? 
O2 Er1 S1 O1 -138.1(3) 51 . . . ? 
O1 Er1 S1 O1 180.0 80_455 . . 82_454 ? 
O2 Er1 S1 O1 -131.9(3) 9_455 . . 82_454 ? 
O2 Er1 S1 O1 48.1(3) . . . 82_454 ? 
O2 Er1 S1 O1 131.9(3) 54_455 . . 82_454 ? 
O2 Er1 S1 O1 -48.1(3) 51 . . 82_454 ? 
O1 Er1 S1 O1 90.000(3) 82_454 . . 51 ? 
O1 Er1 S1 O1 -90.000(3) 80_455 . . 51 ? 
O2 Er1 S1 O1 -41.9(3) 9_455 . . 51 ? 
O2 Er1 S1 O1 138.1(3) . . . 51 ? 
O2 Er1 S1 O1 -138.1(3) 54_455 . . 51 ? 
O2 Er1 S1 O1 41.9(3) 51 . . 51 ? 
O1 Er1 S1 Er1 0.0 82_454 . . 80_455 ? 
O1 Er1 S1 Er1 180.0 80_455 . . 80_455 ? 
O2 Er1 S1 Er1 -131.9(3) 9_455 . . 80_455 ? 
O2 Er1 S1 Er1 48.1(3) . . . 80_455 ? 
O2 Er1 S1 Er1 131.9(3) 54_455 . . 80_455 ? 
O2 Er1 S1 Er1 -48.1(3) 51 . . 80_455 ? 
O1 S1 O1 Er1 -126.9(6) 80_455 . . 80_455 ? 
O1 S1 O1 Er1 126.9(6) 82_454 . . 80_455 ? 
O1 S1 O1 Er1 0.0 51 . . 80_455 ? 
Er1 S1 O1 Er1 180.0 . . . 80_455 ? 
O1 S1 O1 Er1' -126.9(6) 80_455 . . 80_455 ? 
O1 S1 O1 Er1' 126.9(6) 82_454 . . 80_455 ? 
O1 S1 O1 Er1' 0.0 51 . . 80_455 ? 
O1 Er1 O2 C6 157(4) 82_454 . . . ? 
O1 Er1 O2 C6 115(4) 80_455 . . . ? 
O2 Er1 O2 C6 -43(4) 9_455 . . . ? 
O2 Er1 O2 C6 38(5) 54_455 . . . ? 
O2 Er1 O2 C6 -122(4) 51 . . . ? 
S1 Er1 O2 C6 137(4) . . . . ? 
O1 Er1 O2 Er1' -160.0(4) 82_454 . . . ? 
O1 Er1 O2 Er1' 157.6(5) 80_455 . . . ? 
O2 Er1 O2 Er1' 0.0 9_455 . . . ? 
O2 Er1 O2 Er1' 80.9(3) 54_455 . . . ? 
O2 Er1 O2 Er1' -78.8(3) 51 . . . ? 
S1 Er1 O2 Er1' 180.0 . . . . ? 
O2 Er1' O2 C6 157(2) 9_455 . . . ? 
O2 Er1' O2 C6 78(2) 54_455 . . . ? 
O2 Er1' O2 C6 -125(2) 51 . . . ? 
O3 Er1' O2 C6 -23(2) . . . . ? 
O1 Er1' O2 C6 173(2) 82_454 . . . ? 
O1 Er1' O2 C6 143(2) 80_455 . . . ? 
O2 Er1' O3 Er1' 41.9(3) 9_455 . . 53_455 ? 
O2 Er1' O3 Er1' -138.1(3) . . . 53_455 ? 
O2 Er1' O3 Er1' 138.1(3) 54_455 . . 53_455 ? 
O2 Er1' O3 Er1' -41.9(3) 51 . . 53_455 ? 
O1 Er1' O3 Er1' -90.0 82_454 . . 53_455 ? 
O1 Er1' O3 Er1' 90.0 80_455 . . 53_455 ? 
O2 Er1' O3 Er1' 0(100) 9_455 . . 49_455 ? 
O2 Er1' O3 Er1' 0.0 . . . 49_455 ? 
O2 Er1' O3 Er1' 0(100) 54_455 . . 49_455 ? 
O2 Er1' O3 Er1' 0.0 51 . . 49_455 ? 
O1 Er1' O3 Er1' 0.0 82_454 . . 49_455 ? 
O1 Er1' O3 Er1' 0(100) 80_455 . . 49_455 ? 
O2 Er1' O3 Er1' -138.1(3) 9_455 . . 5 ? 
O2 Er1' O3 Er1' 41.9(3) . . . 5 ? 
O2 Er1' O3 Er1' -41.9(3) 54_455 . . 5 ? 
O2 Er1' O3 Er1' 138.1(3) 51 . . 5 ? 
O1 Er1' O3 Er1' 90.0 82_454 . . 5 ? 
O1 Er1' O3 Er1' -90.0 80_455 . . 5 ? 
C3 N1 C3 N1 7(6) 16 . . 15 ? 
C3 N1 C3 C2 -172.8(18) 16 . . . ? 
C4 C2 C3 N1 -175(3) 70 . . . ? 
C4 C2 C3 N1 -5(4) . . . . ? 
C4 C2 C3 N1 5(4) 70 . . 15 ? 
C4 C2 C3 N1 175(3) . . . 15 ? 
C4 C2 C4 C1 -7(5) 70 . . . ? 
C3 C2 C4 C1 -177(2) . . . . ? 
C7 C1 C4 C2 4(4) . . . . ? 
Er1 O2 C6 O2 8(7) . . . 70 ? 
Er1' O2 C6 O2 -15(4) . . . 70 ? 
Er1 O2 C6 C7 -172(3) . . . . ? 
Er1' O2 C6 C7 164.7(17) . . . . ? 
C4 C1 C7 C1 -1(4) . . . 70 ? 
C4 C1 C7 C6 177(3) . . . . ? 
O2 C6 C7 C1 1(4) . . . . ? 
O2 C6 C7 C1 -179(2) 70 . . . ? 
O2 C6 C7 C1 179(2) . . . 70 ? 
O2 C6 C7 C1 -1(4) 70 . . 70 ? 
 
_diffrn_measured_fraction_theta_max    0.994 
_diffrn_reflns_theta_full              24.97 
_diffrn_measured_fraction_theta_full   0.994 
_refine_diff_density_max    1.640 
_refine_diff_density_min   -1.251 
_refine_diff_density_rms    0.129 

#end

  
data_PCN_17_Y 
  
_audit_creation_method            SHELXL-97 
_chemical_name_systematic 
; 
 ? 
; 
_chemical_name_common             'PCN-17 (Y)' 
_chemical_melting_point           'NOT MEASURED' 
_chemical_formula_moiety          
'Y4 (H2O) (SO4)2 (C24H12N3O6)8/3 4(C2H6SO) 2(H2O)' 
_chemical_formula_sum 
 'C72 H62 N8 O31 S6 Y4' 
_chemical_formula_weight          2083.30 
  
loop_ 
 _atom_type_symbol 
 _atom_type_description 
 _atom_type_scat_dispersion_real 
 _atom_type_scat_dispersion_imag 
 _atom_type_scat_source 
 'C'  'C'   0.0033   0.0016 
 'International Tables Vol C Tables 4.2.6.8 and 6.1.1.4' 
 'H'  'H'   0.0000   0.0000 
 'International Tables Vol C Tables 4.2.6.8 and 6.1.1.4' 
 'N'  'N'   0.0061   0.0033 
 'International Tables Vol C Tables 4.2.6.8 and 6.1.1.4' 
 'O'  'O'   0.0106   0.0060 
 'International Tables Vol C Tables 4.2.6.8 and 6.1.1.4' 
 'S'  'S'   0.1246   0.1234 
 'International Tables Vol C Tables 4.2.6.8 and 6.1.1.4' 
 'Y'  'Y'  -2.7962   3.5667 
 'International Tables Vol C Tables 4.2.6.8 and 6.1.1.4' 
  
_symmetry_cell_setting            Cubic 
_symmetry_space_group_name_H-M    Im-3m 
  
loop_ 
 _symmetry_equiv_pos_as_xyz 
 'x, y, z' 
 '-x, -y, z' 
 '-x, y, -z' 
 'x, -y, -z' 
 'z, x, y' 
 'z, -x, -y' 
 '-z, -x, y' 
 '-z, x, -y' 
 'y, z, x' 
 '-y, z, -x' 
 'y, -z, -x' 
 '-y, -z, x' 
 'y, x, -z' 
 '-y, -x, -z' 
 'y, -x, z' 
 '-y, x, z' 
 'x, z, -y' 
 '-x, z, y' 
 '-x, -z, -y' 
 'x, -z, y' 
 'z, y, -x' 
 'z, -y, x' 
 '-z, y, x' 
 '-z, -y, -x' 
 'x+1/2, y+1/2, z+1/2' 
 '-x+1/2, -y+1/2, z+1/2' 
 '-x+1/2, y+1/2, -z+1/2' 
 'x+1/2, -y+1/2, -z+1/2' 
 'z+1/2, x+1/2, y+1/2' 
 'z+1/2, -x+1/2, -y+1/2' 
 '-z+1/2, -x+1/2, y+1/2' 
 '-z+1/2, x+1/2, -y+1/2' 
 'y+1/2, z+1/2, x+1/2' 
 '-y+1/2, z+1/2, -x+1/2' 
 'y+1/2, -z+1/2, -x+1/2' 
 '-y+1/2, -z+1/2, x+1/2' 
 'y+1/2, x+1/2, -z+1/2' 
 '-y+1/2, -x+1/2, -z+1/2' 
 'y+1/2, -x+1/2, z+1/2' 
 '-y+1/2, x+1/2, z+1/2' 
 'x+1/2, z+1/2, -y+1/2' 
 '-x+1/2, z+1/2, y+1/2' 
 '-x+1/2, -z+1/2, -y+1/2' 
 'x+1/2, -z+1/2, y+1/2' 
 'z+1/2, y+1/2, -x+1/2' 
 'z+1/2, -y+1/2, x+1/2' 
 '-z+1/2, y+1/2, x+1/2' 
 '-z+1/2, -y+1/2, -x+1/2' 
 '-x, -y, -z' 
 'x, y, -z' 
 'x, -y, z' 
 '-x, y, z' 
 '-z, -x, -y' 
 '-z, x, y' 
 'z, x, -y' 
 'z, -x, y' 
 '-y, -z, -x' 
 'y, -z, x' 
 '-y, z, x' 
 'y, z, -x' 
 '-y, -x, z' 
 'y, x, z' 
 '-y, x, -z' 
 'y, -x, -z' 
 '-x, -z, y' 
 'x, -z, -y' 
 'x, z, y' 
 '-x, z, -y' 
 '-z, -y, x' 
 '-z, y, -x' 
 'z, -y, -x' 
 'z, y, x' 
 '-x+1/2, -y+1/2, -z+1/2' 
 'x+1/2, y+1/2, -z+1/2' 
 'x+1/2, -y+1/2, z+1/2' 
 '-x+1/2, y+1/2, z+1/2' 
 '-z+1/2, -x+1/2, -y+1/2' 
 '-z+1/2, x+1/2, y+1/2' 
 'z+1/2, x+1/2, -y+1/2' 
 'z+1/2, -x+1/2, y+1/2' 
 '-y+1/2, -z+1/2, -x+1/2' 
 'y+1/2, -z+1/2, x+1/2' 
 '-y+1/2, z+1/2, x+1/2' 
 'y+1/2, z+1/2, -x+1/2' 
 '-y+1/2, -x+1/2, z+1/2' 
 'y+1/2, x+1/2, z+1/2' 
 '-y+1/2, x+1/2, -z+1/2' 
 'y+1/2, -x+1/2, -z+1/2' 
 '-x+1/2, -z+1/2, y+1/2' 
 'x+1/2, -z+1/2, -y+1/2' 
 'x+1/2, z+1/2, y+1/2' 
 '-x+1/2, z+1/2, -y+1/2' 
 '-z+1/2, -y+1/2, x+1/2' 
 '-z+1/2, y+1/2, -x+1/2' 
 'z+1/2, -y+1/2, -x+1/2' 
 'z+1/2, y+1/2, x+1/2' 
  
_cell_length_a                    26.311(3) 
_cell_length_b                    26.311(3) 
_cell_length_c                    26.311(3) 
_cell_angle_alpha                 90.00 
_cell_angle_beta                  90.00 
_cell_angle_gamma                 90.00 
_cell_volume                      18214(4) 
_cell_formula_units_Z             6 
_cell_measurement_temperature     213(2) 
_cell_measurement_reflns_used     ? 
_cell_measurement_theta_min       ? 
_cell_measurement_theta_max       ? 
  
_exptl_crystal_description        block 
_exptl_crystal_colour             'light yellow' 
_exptl_crystal_size_max           0.16 
_exptl_crystal_size_mid           0.14
_exptl_crystal_size_min           0.11 
_exptl_crystal_density_meas       none 
_exptl_crystal_density_diffrn     1.140 
_exptl_crystal_density_method     'not measured' 
_exptl_crystal_F_000              6300 
_exptl_absorpt_coefficient_mu     2.056 
_exptl_absorpt_correction_type    empirical 
_exptl_absorpt_correction_T_min   0.727 
_exptl_absorpt_correction_T_max   0.798 
_exptl_absorpt_process_details    SADABS 
  
_exptl_special_details 
; 
 ? 
; 
  
_diffrn_ambient_temperature       213(2) 
_diffrn_radiation_wavelength      0.71073 
_diffrn_radiation_type            MoK\a 
_diffrn_radiation_source          'fine-focus sealed tube' 
_diffrn_radiation_monochromator   graphite 
_diffrn_measurement_device_type   'Bruker P4' 
_diffrn_measurement_method        '\w scans' 
_diffrn_detector_area_resol_mean  ? 
_diffrn_standards_number          ? 
_diffrn_standards_interval_count  ? 
_diffrn_standards_interval_time   ? 
_diffrn_standards_decay_%         ? 
_diffrn_reflns_number             23757 
_diffrn_reflns_av_R_equivalents   0.0886 
_diffrn_reflns_av_sigmaI/netI     0.0259 
_diffrn_reflns_limit_h_min        -23 
_diffrn_reflns_limit_h_max        22 
_diffrn_reflns_limit_k_min        -23 
_diffrn_reflns_limit_k_max        18 
_diffrn_reflns_limit_l_min        -23 
_diffrn_reflns_limit_l_max        23 
_diffrn_reflns_theta_min          1.09 
_diffrn_reflns_theta_max          18.81 
_reflns_number_total              741 
_reflns_number_gt                 514 
_reflns_threshold_expression      >2sigma(I) 
  
_computing_data_collection        'Bruker XSCANS' 
_computing_cell_refinement        'Bruker XSCANS' 
_computing_data_reduction         'Bruker SHELXTL' 
_computing_structure_solution     'SHELXS-97 (Sheldrick, 1990)' 
_computing_structure_refinement   'SHELXL-97 (Sheldrick, 1997)' 
_computing_molecular_graphics     'Bruker SHELXTL' 
_computing_publication_material   'Bruker SHELXTL' 
  
_refine_special_details 
; 
 Refinement of F^2^ against ALL reflections.  The weighted R-factor wR and 
 goodness of fit S are based on F^2^, conventional R-factors R are based 
 on F, with F set to zero for negative F^2^. The threshold expression of 
 F^2^ > 2sigma(F^2^) is used only for calculating R-factors(gt) etc. and is 
 not relevant to the choice of reflections for refinement.  R-factors based 
 on F^2^ are statistically about twice as large as those based on F, and R- 
 factors based on ALL data will be even larger. 
; 
  
_refine_ls_structure_factor_coef  Fsqd 
_refine_ls_matrix_type            full 
_refine_ls_weighting_scheme       calc 
_refine_ls_weighting_details 
 'calc w=1/[\s^2^(Fo^2^)+(0.2000P)^2^+0.0000P] where P=(Fo^2^+2Fc^2^)/3' 
_atom_sites_solution_primary      direct 
_atom_sites_solution_secondary    difmap 
_atom_sites_solution_hydrogens    geom 
_refine_ls_hydrogen_treatment     constr 
_refine_ls_extinction_method      none 
_refine_ls_extinction_coef        ? 
_refine_ls_number_reflns          741 
_refine_ls_number_parameters      93 
_refine_ls_number_restraints      0 
_refine_ls_R_factor_all           0.1104 
_refine_ls_R_factor_gt            0.0921 
_refine_ls_wR_factor_ref          0.2707 
_refine_ls_wR_factor_gt           0.2555 
_refine_ls_goodness_of_fit_ref    1.107 
_refine_ls_restrained_S_all       1.107 
_refine_ls_shift/su_max           0.000 
_refine_ls_shift/su_mean          0.000 
  
loop_ 
 _atom_site_label 
 _atom_site_type_symbol 
 _atom_site_fract_x 
 _atom_site_fract_y 
 _atom_site_fract_z 
 _atom_site_U_iso_or_equiv 
 _atom_site_adp_type 
 _atom_site_occupancy 
 _atom_site_symmetry_multiplicity 
 _atom_site_calc_flag 
 _atom_site_refinement_flags 
 _atom_site_disorder_assembly 
 _atom_site_disorder_group 
Y1' Y -0.5000 0.1143(8) 0.0000 0.290(14) Uani 0.50 4 d SP . . 
Y1 Y -0.5000 0.1359(3) 0.0000 0.0783(19) Uani 0.50 4 d SP . . 
S1 S -0.5000 0.2500 0.0000 0.149(4) Uani 1 8 d S . . 
O1 O -0.5000 0.2872(5) 0.0390(6) 0.288(12) Uani 1 2 d S . . 
O2 O -0.4444(3) 0.1230(4) 0.0608(4) 0.168(5) Uani 1 1 d . . . 
O3 O -0.5000 0.0000 0.0000 0.31(3) Uani 1 16 d S . . 
N1 N -0.2337(5) 0.2337(5) 0.1683(6) 0.160(7) Uani 1 2 d S . . 
C1 C -0.3626(5) 0.1674(6) 0.1028(5) 0.181(8) Uani 1 1 d . . . 
H1A H -0.3776 0.1820 0.0739 0.217 Uiso 1 1 calc R . . 
C2 C -0.2978(6) 0.1683(5) 0.1683(5) 0.122(6) Uani 1 2 d S . . 
C3 C -0.2532(6) 0.1928(5) 0.1928(5) 0.143(7) Uani 1 2 d S . . 
C4 C -0.3196(5) 0.1890(5) 0.1265(5) 0.147(6) Uani 1 1 d . . . 
H4A H -0.3056 0.2189 0.1128 0.176 Uiso 1 1 calc R . . 
C6 C -0.4281(7) 0.1003(6) 0.1003(6) 0.138(7) Uani 1 2 d S . . 
C7 C -0.3808(7) 0.1241(6) 0.1241(6) 0.142(8) Uani 1 2 d S . . 
O6 O -0.2501(6) 0.0000 0.2501(6) 0.31(2) Uani 1 4 d S . . 
S2 S -0.2856(4) 0.0000 0.2856(4) 0.291(9) Uani 1 4 d S . . 
O4 O -0.1590(9) 0.0000 0.0000 0.170(10) Uani 1 8 d S . . 
C8 C -0.2768(8) 0.0000 0.3454(10) 0.213(10) Uani 1 2 d S . . 
H8A H -0.3094 0.0000 0.3626 0.320 Uiso 1 2 calc SR . . 
H8B H -0.2578 0.0301 0.3550 0.320 Uiso 0.50 1 calc PR . . 
H8C H -0.2578 -0.0301 0.3550 0.320 Uiso 0.50 1 calc PR . . 
  
loop_ 
 _atom_site_aniso_label 
 _atom_site_aniso_U_11 
 _atom_site_aniso_U_22 
 _atom_site_aniso_U_33 
 _atom_site_aniso_U_23 
 _atom_site_aniso_U_13 
 _atom_site_aniso_U_12 
Y1' 0.101(8) 0.68(4) 0.084(7) 0.000 0.000 0.000 
Y1 0.014(3) 0.144(4) 0.077(4) 0.000 0.000 0.000 
S1 0.130(6) 0.189(12) 0.130(6) 0.000 0.000 0.000 
O1 0.61(4) 0.123(12) 0.131(11) -0.022(9) 0.000 0.000 
O2 0.108(7) 0.222(11) 0.173(9) 0.048(7) -0.076(8) -0.047(6) 
O3 0.31(8) 0.31(4) 0.31(4) 0.000 0.000 0.000 
N1 0.161(9) 0.161(9) 0.158(13) 0.092(9) -0.092(9) -0.124(12) 
C1 0.120(10) 0.259(18) 0.164(13) 0.114(13) -0.086(9) -0.114(12) 
C2 0.100(12) 0.132(9) 0.132(9) 0.063(12) -0.060(9) -0.060(9) 
C3 0.114(14) 0.158(11) 0.158(11) 0.067(15) -0.066(11) -0.066(11) 
C4 0.139(10) 0.147(11) 0.153(11) 0.068(9) -0.091(9) -0.077(10) 
C6 0.063(12) 0.176(12) 0.176(12) 0.004(18) -0.045(8) -0.045(8) 
C7 0.100(14) 0.164(11) 0.164(11) 0.081(14) -0.048(11) -0.048(11) 
O6 0.199(18) 0.52(6) 0.199(18) 0.000 0.12(2) 0.000 
S2 0.155(6) 0.56(3) 0.155(6) 0.000 -0.048(9) 0.000 
O4 0.120(18) 0.195(16) 0.195(16) 0.000 0.000 0.000 
C8 0.17(2) 0.23(3) 0.24(3) 0.000 0.00(2) 0.000 
  
_geom_special_details 
; 
 All esds (except the esd in the dihedral angle between two l.s. planes) 
 are estimated using the full covariance matrix.  The cell esds are taken 
 into account individually in the estimation of esds in distances, angles 
 and torsion angles; correlations between esds in cell parameters are only 
 used when they are defined by crystal symmetry.  An approximate (isotropic) 
 treatment of cell esds is used for estimating esds involving l.s. planes. 
; 
  
loop_ 
 _geom_bond_atom_site_label_1 
 _geom_bond_atom_site_label_2 
 _geom_bond_distance 
 _geom_bond_site_symmetry_2 
 _geom_bond_publ_flag 
Y1' O2 2.179(9) . ? 
Y1' O1 2.79(2) 46_455 ? 
Y1 O2 2.194(9) . ? 
Y1 O1 2.268(17) 93_455 ? 
S1 O1 1.417(13) . ? 
S1 O1 1.417(13) 50 ? 
S1 O1 1.417(13) 93_455 ? 
S1 O1 1.417(13) 46_455 ? 
O2 C6 1.273(19) . ? 
N1 C3 1.355(19) . ? 
C1 C7 1.356(15) . ? 
C1 C4 1.410(15) . ? 
C1 H1A 0.9400 . ? 
C2 C4 1.355(11) . ? 
C2 C3 1.486(19) . ? 
C4 H4A 0.9400 . ? 
C6 C7 1.53(3) . ? 
O6 S2 1.32(2) . ? 
S2 C8 1.59(3) . ? 
S2 C8 1.59(3) 70 ? 
C8 H8A 0.9700 . ? 
C8 H8B 0.9700 . ? 
C8 H8C 0.9700 . ? 
  
loop_ 
 _geom_angle_atom_site_label_1 
 _geom_angle_atom_site_label_2 
 _geom_angle_atom_site_label_3 
 _geom_angle 
 _geom_angle_site_symmetry_1 
 _geom_angle_site_symmetry_3 
 _geom_angle_publ_flag 
O2 Y1' O2 167.9(12) . 3_455 ? 
O2 Y1' O2 84.3(5) . 52_455 ? 
O2 Y1' O2 94.4(5) 3_455 52_455 ? 
O2 Y1' O2 94.4(5) . 50 ? 
O2 Y1' O2 84.3(5) 3_455 50 ? 
O2 Y1' O2 167.9(12) 52_455 50 ? 
O2 Y1' O1 69.8(5) . 46_455 ? 
O2 Y1' O1 98.6(7) 3_455 46_455 ? 
O2 Y1' O1 98.6(7) 52_455 46_455 ? 
O2 Y1' O1 69.8(5) 50 46_455 ? 
O2 Y1' O1 98.6(7) . 93_455 ? 
O2 Y1' O1 69.8(5) 3_455 93_455 ? 
O2 Y1' O1 69.8(5) 52_455 93_455 ? 
O2 Y1' O1 98.6(7) 50 93_455 ? 
O1 Y1' O1 43.2(6) 46_455 93_455 ? 
O2 Y1 O2 162.2(6) 3_455 . ? 
O2 Y1 O2 93.6(5) 3_455 52_455 ? 
O2 Y1 O2 83.7(5) . 52_455 ? 
O2 Y1 O2 83.7(5) 3_455 50 ? 
O2 Y1 O2 93.6(5) . 50 ? 
O2 Y1 O2 162.2(6) 52_455 50 ? 
O2 Y1 O1 116.1(4) 3_455 46_455 ? 
O2 Y1 O1 80.6(4) . 46_455 ? 
O2 Y1 O1 116.1(4) 52_455 46_455 ? 
O2 Y1 O1 80.6(4) 50 46_455 ? 
O2 Y1 O1 80.6(4) 3_455 93_455 ? 
O2 Y1 O1 116.1(4) . 93_455 ? 
O2 Y1 O1 80.6(4) 52_455 93_455 ? 
O2 Y1 O1 116.1(4) 50 93_455 ? 
O1 Y1 O1 53.7(7) 46_455 93_455 ? 
O1 S1 O1 92.7(12) . 50 ? 
O1 S1 O1 118.5(7) . 93_455 ? 
O1 S1 O1 118.5(7) 50 93_455 ? 
O1 S1 O1 118.5(7) . 46_455 ? 
O1 S1 O1 118.5(7) 50 46_455 ? 
O1 S1 O1 92.7(12) 93_455 46_455 ? 
C6 O2 Y1' 140.9(11) . . ? 
C6 O2 Y1 153.2(10) . . ? 
C3 N1 C3 111.9(14) . 7 ? 
C7 C1 C4 116.1(12) . . ? 
C7 C1 H1A 121.9 . . ? 
C4 C1 H1A 121.9 . . ? 
C4 C2 C4 118.3(13) 67 . ? 
C4 C2 C3 120.8(7) 67 . ? 
C4 C2 C3 120.8(7) . . ? 
N1 C3 N1 127.8(14) . 10 ? 
N1 C3 C2 115.9(7) . . ? 
N1 C3 C2 115.9(7) 10 . ? 
C2 C4 C1 122.4(11) . . ? 
C2 C4 H4A 118.8 . . ? 
C1 C4 H4A 118.8 . . ? 
O2 C6 O2 130.7(17) 67 . ? 
O2 C6 C7 114.6(8) 67 . ? 
O2 C6 C7 114.6(8) . . ? 
C1 C7 C1 124.6(17) . 67 ? 
C1 C7 C6 117.6(8) . . ? 
C1 C7 C6 117.6(8) 67 . ? 
O6 S2 C8 126.6(9) . . ? 
O6 S2 C8 126.6(9) . 70 ? 
C8 S2 C8 106.7(19) . 70 ? 
S2 C8 H8A 109.5 . . ? 
S2 C8 H8B 109.5 . . ? 
H8A C8 H8B 109.5 . . ? 
S2 C8 H8C 109.5 . . ? 
H8A C8 H8C 109.5 . . ? 
H8B C8 H8C 109.5 . . ? 
  
_diffrn_measured_fraction_theta_max    1.000 
_diffrn_reflns_theta_full              18.81 
_diffrn_measured_fraction_theta_full   1.000 
_refine_diff_density_max    0.945 
_refine_diff_density_min   -0.535 
_refine_diff_density_rms    0.097 
  
